# Supplementary material
Source: MDPI journal article supplement (https://www.mdpi.com/1424-2818/13/11/510)
Supplement: s1 [file s1]

# Zoometric Characterization of Creole cows from the Southern Amazon Region of Peru

Ricardo Encina Ruiz <sup>1</sup>, José Américo Saucedo-Uriarte <sup>2,\*</sup>, Segundo Melecio Portocarrero-Villegas <sup>3</sup>, Hurley Quispe-Ccasa <sup>2</sup>, and I.S. Cayo-Colca <sup>2,\*</sup>

<sup>1</sup> Laboratorio de Biotecnología Reproductiva y Mejoramiento Genético, Amazonas, 01001, Perú; ricardo.encina@untrm.edu.pe

<sup>2</sup> Escuela de Posgrado de la Universidad Nacional Toribio Rodríguez de Mendoza de Amazonas, Amazonas, 01001, Perú; saucedouriarte@gmail.com

<sup>3</sup> Laboratorio de Enfermedades Infecciosas y Parasitarias de Animales Domésticos, Amazonas, 01001, Perú; segundo.portocarrero@untrm.edu.pe

\* Correspondence: saucedouriarte@gmail.com; Tel.: (+51 975576115; J.A.S.U)

**Table S1.** Creole bovine location.

| Province    | District                  | South Latitude | West Longitude | Life Zone | Average Temperature | masl |
|-------------|---------------------------|----------------|----------------|-----------|---------------------|------|
| Chachapoyas | Soloco                    | 6°17'21"       | 77°41'03"      | TM-mf     | 16 °C               | 2188 |
|             | San Francisco de Dasaguas | 6°13'53"       | 77°43'51"      | TM-rf     | 15.5 °C             | 1999 |
|             | Molinopampa               | 6°12'46"       | 77°40'02"      | LTM-mf    | 14.5 °C             | 2389 |
|             | Olleros                   | 6°03'12"       | 77°38'33"      | TM-mf     | 10.5 °C             | 3098 |
|             | Quinjalca                 | 6°05'18"       | 77°40'36"      | LTM-mf    | 10.6 °C             | 3050 |
|             | Huancas                   | 6°09'56"       | 77°51'50"      | TM-df     | 16 °C               | 2619 |
| Luya        | Colcamar                  | 6°18'07"       | 77°58'46"      | TM-vmm    | 16 °C               | 2384 |
|             | Conila                    | 6°07'23"       | 78°12'29"      | LMT-df    | 12 °C               | 2533 |
|             | Inguilpata                | 6°10'00"       | 78°04'38"      | TM-vmf    | 17 °C               | 2818 |
| Bongará     | Cuispes                   | 5°55'29"       | 77°56'40"      | LMT-df    | 19 °C               | 1888 |
|             | San Carlos                | 5°58'15"       | 77°53'07"      | TM-df     | 15 °C               | 2821 |

These locations refer to where female Creole bovine data was taken. TM-mf: Tropical Montane moist forest. TM-rf: Tropical Montane rain forest, LTM-mf: Low Tropical Montane moist forest, TM-mf: Tropical Montane moist forest, TLM-mf: Tropical Low Montane moist forest, TM-df: Tropical Montane dry forest, TM-vmm: Tropical Montane very moist forest, LMT-df: Low Tropical Montane dry forest, masl: meters above sea level.

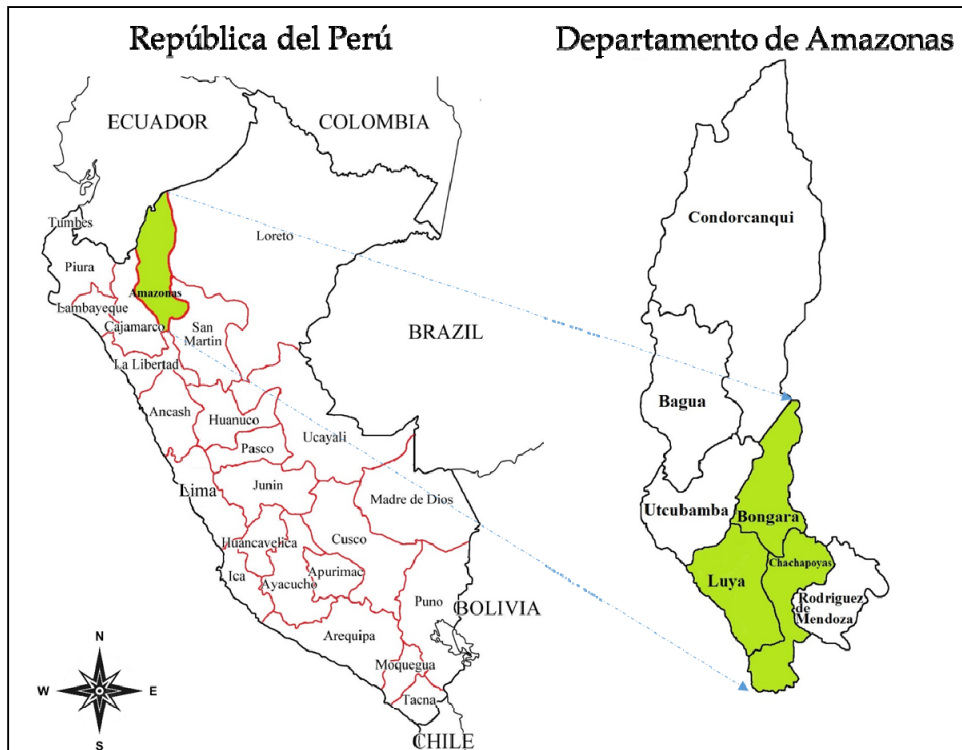

**Figure S1.** Geographical location of Chachapoyas, Luya and Bongará province in Amazonas.

**Table S2.** Qualitative and quantitative traits<sup>1</sup> of creole bovine.

| Quantitative traits |                       |                      |                   |                        |                     |             |
|---------------------|-----------------------|----------------------|-------------------|------------------------|---------------------|-------------|
| Structure           | Raised to sacrum      | Body depth           | Hip width         | Back length            | Rump length         | Pelvic tilt |
| Udder               | Teats length          | Teats thickness      | Fore udder length | Udder depth            | Central ligament    |             |
| Qualitative traits  |                       |                      |                   |                        |                     |             |
| Muscularity         | Concave               | Slightly concave     | Straight          | Slightly convex/normal | Convex / thin       |             |
| Udder               | Fore udder attachment | Front teat placement | Rear udder length | Rear teat orientation  | Rear teat placement |             |
| Coloring pattern    | Simple                | Compound             |                   |                        | Mixed               |             |
| Coat color          | See figure 2          |                      |                   |                        |                     |             |
| Hoof color          | Dark                  |                      |                   |                        | Clear               |             |
| Horn tip color      | Black                 | Dark                 |                   |                        | Amber               |             |

<sup>1</sup>Classification according to <https://www.fleckscore.com/> and [21, 22]

---

**Table S3.** Defects of female Creole cows.

| <b>Udder</b>                 | <b>Body</b>        | <b>Feet and Leg</b>  |
|------------------------------|--------------------|----------------------|
| Presence or absence of edema | Backline impressed | Loosely shoulder     |
| Staged udder                 | Kidney impressed   | Front legs distorted |
| Teats distance close         | Chest narrow       | Hindfoot outwards    |
| Teats crumbly                | Rump narrow        | Rolled hoof          |
| Front teats spread out       | Rump arched        | Splayed hoof         |
| Front teats spread forward   |                    |                      |

<sup>1</sup>Defects according to the FleckScore classification.

**Table S4.** Body Condition [24]

| Score         | 1                                   | 2                                           | 3                                                                                               | 4                                                               | 5                                                                                 |
|---------------|-------------------------------------|---------------------------------------------|-------------------------------------------------------------------------------------------------|-----------------------------------------------------------------|-----------------------------------------------------------------------------------|
| Backbone      | Animal with a spine easily palpable | Animal with some fatty tissue on the spine. | There is no visible spine.                                                                      | They had no visible spinal column, visible only when pressured. | They are characterised by a well-rounded spinal column covered with fatty tissue. |
| Hip bone      | Very prominent hip bone.            | More rounded hip bone.                      | Barely perceptible and well covered with fatty tissue.                                          | Only visible when pressured.                                    | No visible                                                                        |
| Tailhead      | Deep cavity around the tailhead.    | Shallow cavity around the tailhead.         | No visible cavity around the tailhead, which is slightly rounded and covered with fatty tissue. | Folds of fatty tissue are observed around the tailhead.         | The tailhead is buried in a thick layer of fatty tissue.                          |
| Ribs          | Palpable and prominent.             | Palpable and slightly prominent.            | Visible and covered by fatty tissue                                                             | Hardly visible.                                                 | No visible and palpable.                                                          |
| Overall state | Emaciated bovine                    | Slender and healthy-looking animal.         | Firm and not obese.                                                                             | Obese with full hindquarters.                                   | Extremely obese, with excessively full hindquarters.                              |

---

**Table S5.** Validation of the clusters or cow biotypes by ANOVA, KMO and Bartlett test

| ANOVA                                           |                     |                    |                |        |              |
|-------------------------------------------------|---------------------|--------------------|----------------|--------|--------------|
|                                                 | Sum of squares      | Degrees of freedom | Quadratic mean | F      | Significance |
| Between groups                                  | 1640,153            | 2                  | 820,077        | 16,386 | ,000         |
| Within groups                                   | 4604,268            | 92                 | 50,046         |        |              |
| Total                                           | 6244,421            | 94                 |                |        |              |
| KMO and Bartlett test                           |                     |                    |                |        |              |
| Kaiser-Meyer-Olkin measure of sampling adequacy |                     |                    |                |        | ,389         |
|                                                 | Aprox. Chi-cuadrado |                    |                |        | 2175,904     |
| Bartlett's test of sphericity                   | Degrees of freedom  |                    |                |        | 946          |
|                                                 | Significance        |                    |                |        | ,000         |

**Table S6.** Qualitative traits of creole cows (N = 95) according to age and lactation (%)<sup>1</sup>.

| Age                       | Six-teeth | Eight-teeth | Full-mouth | P-value    |         |
|---------------------------|-----------|-------------|------------|------------|---------|
| Muscularity               |           |             |            |            |         |
| Concave                   | 4.8       | 12.9        | 4.7        | 0.032**    |         |
| Slightly concave          | 28.6      | 16.1        | 27.9       |            |         |
| Straight                  | 61.9      | 67.7        | 41.9       |            |         |
| Slightly convex/normal    | 4.8       | 3.2         | 25.6       |            |         |
| Fore udder attachment (°) |           |             |            |            |         |
| 10 to 20                  | 4.8       | 19.4        | 7.0        | 0.007**    |         |
| 20 to 30                  | 4.8       | 9.7         | 0.0        |            |         |
| 30 to 40                  | 66.7      | 51.6        | 32.6       |            |         |
| 40 to 50                  | 23.8      | 6.5         | 44.2       |            |         |
| 50 to 60                  | 0.0       | 9.7         | 14.0       |            |         |
| 60 to 70                  | 0.0       | 3.2         | 2.3        |            |         |
| Front teat placement      |           |             |            |            |         |
| Very protruding           | 42.9      | 25.8        | 11.6       | 0.006**    |         |
| Centered                  | 23.8      | 38.7        | 48.8       |            |         |
| Slightly inward           | 0.0       | 9.7         | 27.9       |            |         |
| Inward                    | 33.3      | 22.6        | 9.3        |            |         |
| Very inward               | 0.0       | 3.2         | 2.3        |            |         |
| Hock angularity (°)       |           |             |            |            |         |
| Slightly angled           | 0.0       | 50.0        | 50.0       | 0.756      |         |
| Slightly angled           | 0.0       | 57.1        | 42.9       |            |         |
| Normal angulation         | 22.6      | 25.8        | 51.6       |            |         |
| Slightly more angled      | 27.5      | 32.5        | 40.0       |            |         |
| Very angled               | 20.0      | 33.3        | 46.7       |            |         |
| Hock development          |           |             |            |            |         |
| Undefined                 | 9.5       | 6.5         | 16.3       | 0.565      |         |
| Slightly undefined        | 52.4      | 58.1        | 34.9       |            |         |
| Clear                     | 33.3      | 32.3        | 44.2       |            |         |
| Very defined              | 4.8       | 3.2         | 4.7        |            |         |
| Pasterns                  |           |             |            |            |         |
| Flexible                  | 23.8      | 22.6        | 18.6       | 0.92       |         |
| Slightly flexible         | 61.9      | 54.8        | 58.1       |            |         |
| Tight                     | 14.3      | 22.6        | 23.3       |            |         |
| Lactation                 | 1st Lact  | 2nd Lact    | 3rd Lact   | ≥ 4th Lact | P-value |
| Muscularity               |           |             |            |            |         |
| Concave                   | 0.0       | 71.4        | 28.6       | 0.0        | 0.068   |
| Slightly concave          | 13.0      | 47.8        | 30.4       | 8.7        |         |
| Straight                  | 21.2      | 59.6        | 17.3       | 1.9        |         |
| Slightly concave/normal   | 7.7       | 23.1        | 53.8       | 15.4       |         |

|                           |       |      |      |      |         |
|---------------------------|-------|------|------|------|---------|
| Fore udder attachment (°) |       |      |      |      |         |
| 10 to 20                  | 30.0  | 60.0 | 10.0 | 0.0  | 0.437   |
| 20 to 30                  | 25.0  | 75.0 | 0.0  | 0.0  |         |
| 30 to 40                  | 20.5) | 56.8 | 18.2 | 4.5  |         |
| 40 to 50                  | 7.7   | 42.3 | 42.3 | 7.7  |         |
| 50 to 60                  | 0.0   | 44.4 | 44.4 | 11.1 |         |
| 60 to 70                  | 0.0   | 50.0 | 50.0 | 0.0  |         |
| Front teat placement      |       |      |      |      |         |
| Very protruding           | 13.6  | 72.7 | 9.1  | 4.5  | 0.007** |
| Centered                  | 18.4  | 42.1 | 28.9 | 10.5 |         |
| Slightly inward           | 13.3  | 20.0 | 66.7 | 0.0  |         |
| Inward                    | 16.7  | 77.8 | 5.6  | 0.0  |         |
| Very inward               | 0.0   | 50.0 | 50.0 | 0.0  |         |
| Hock angularity (°)       |       |      |      |      |         |
| Slightly angled           | 50.0  | 50.0 | 0.0  | 0.0  | 0.689   |
| Slightly angled           | 28.6  | 28.6 | 42.9 | 0.0  |         |
| Normal angulation         | 19.4  | 45.2 | 29.0 | 6.5  |         |
| Slightly more angled      | 10.0  | 62.5 | 20.0 | 7.5  |         |
| Very angled               | 13.3  | 53.3 | 33.3 | 0.0  |         |
| Hock development          |       |      |      |      |         |
| Undefined                 | 27.3  | 45.5 | 18.2 | 9.1  | 0.873   |
| Slightly undefined        | 11.4  | 59.1 | 25.0 | 4.5  |         |
| Clear                     | 16.7  | 50.0 | 27.8 | 5.6  |         |
| Very defined              | 25.0  | 25.0 | 50.0 | 0.0  |         |
| Pasterns                  |       |      |      |      |         |
| Flexible                  | 15.0  | 50.0 | 25.0 | 10.0 | 0.974   |
| Slightly flexible         | 16.4  | 52.7 | 27.3 | 3.6  |         |
| Tight                     | 15.0  | 55.0 | 25.0 | 5.0  |         |

<sup>1</sup> Asymptotic (two-sided) significance using Pearson's chi-square in SPSS v. 15; \* Significant (p <0.05), \*\* Highly significant (p <0.01).



**Table S7.** Presence of defect in structure traits of Creole cow (N = 95) according to age and lactation (%)<sup>1</sup>

| Age                    | Six- teeth | Eight- teeth | Full-mouth | P-value    |         |
|------------------------|------------|--------------|------------|------------|---------|
| Backline impressed     | 14.3       | 32.3         | 32.6       | 0.266      |         |
| Kidney impressed       | 14.3       | 32.3         | 30.2       | 0.308      |         |
| Chest narrow           | 42.9       | 25.8         | 14         | 0.039*     |         |
| Rump narrow            | 19.1       | 6.5          | 23.3       | 0.155      |         |
| Rump roof shaped       | 14.3       | 22.6         | 30.2       | 0.364      |         |
| Loosely shoulder       | 38.1       | 12.9         | 39.5       | 0.034*     |         |
| Hindfoot outwards      | 61.9       | 74.2         | 67.4       | 0.634      |         |
| Rolled hoof            | 0.0        | 6.5          | 4.7        | 0.514      |         |
| Splayed hoof           | 0.0        | 6.5          | 7.0        | 0.471      |         |
| Udder edema            | 0.0        | 3.2          | 0.0        | 0.352      |         |
| Staged Udder           | 33.3       | 22.6         | 48.8       | 0.065      |         |
| Teats distance close   | 61.9       | 74.2         | 60.5       | 0.442      |         |
| Teats crumbly          | 0.0        | 0.0          | 2.3        | 0.543      |         |
| Front teats spread out | 0.0        | 6.5          | 2.3        | 0.39       |         |
| Teats spread forward   | 0.0        | 0.0          | 2.3        | 0.543      |         |
| Front legs distroted   | 9.5        | 0.0          | 0.0        | 0.027*     |         |
| Lactation              | 1st Lact   | 2nd Lact     | 3rd Lact   | ≥ 4th Lact | P-value |
| Backline impressed     | 14.8       | 40.7         | 40.7       | 3.7        | 0.241   |
| Kidney impressed       | 15.4       | 42.3         | 38.5       | 3.8        | 0.412   |
| Chest narrow           | 17.4       | 60.9         | 13.0       | 8.7        | 0.369   |
| Rump narrow            | 25.0       | 43.8         | 25.0       | 6.3        | 0.712   |
| Rump roof shaped       | 21.7       | 30.4         | 39.1       | 8.7        | 0.107   |
| Loosely shoulder       | 20.7       | 44.8         | 34.5       | 0.0        | 0.224   |
| Front legs distroted   | 0.0        | 100.0        | 0.0        | 0.0        | 0.607   |
| Hindfoot outwards      | 10.8       | 56.9         | 27.7       | 4.6        | 0.229   |
| Rolled hoof            | 50.0       | 25.0         | 25.0       | 0.0        | 0.27    |
| Splayed hoof           | 0.0        | 40.0         | 40.0       | 20.0       | 0.315   |
| Udder edema            | 0.0        | 100.0        | 0.0        | 0.0        | 0.823   |
| Staged udder           | 20.0       | 40.0         | 31.3       | 8.6        | 0.261   |
| Teats distance closes  | 14.5       | 59.7         | 22.6       | 3.2        | 0.239   |
| Teats crumbly          | 0.0        | 100.0        | 0.0        | 0.0        | 0.823   |
| Front teats spread out | 0.0        | 66.7         | 33.3       | 0.0        | 0.843   |
| Teats spread forward   | 0.0        | 100.0        | 0.0        | 0.0        | 0.823   |

<sup>1</sup> Asymptotic (two-sided) significance using Pearson's chi-square in SPSS v. 15.

**Table S8.** Quantitative traits of Creole cows (N = 95) according to age and lactation

| <b>Age</b>             | <b>6 teeth</b>        | <b>8 teeth</b>        | <b>Full-mouth</b>      | <b>Total</b> | <b>P-value</b> |
|------------------------|-----------------------|-----------------------|------------------------|--------------|----------------|
| N                      | 21                    | 31                    | 43                     | 95           |                |
| Height at cross        | 125.8±8.5             | 125.5±7.4             | 124.4±8.6              | 124.6±8.2    | 0.42           |
| Body depth             | 68.3±4.5              | 69.0±7.6              | 72.1±8.2               | 70.3±7.5     | 0.08           |
| Hip width              | 45.4±5.0              | 46.4±4.1              | 45.1±4.4               | 45.6±4.4     | 0.5            |
| Back length            | 84.5±7.2              | 87.9±9.2              | 92.2±12.8              | 89.1±11.0    | 0.21           |
| Rump length            | 45.5±3.0              | 46.0±3.4              | 44.9±3.1               | 45.4±3.2     | 0.3            |
| Teats length           | 5.1±0.9               | 6.0±1.6               | 5.8±1.4                | 5.7±1.4      | 0.07           |
| Teats thickness        | 2.6±0.4               | 2.6±0.5               | 2.9±0.4                | 2.7±0.5      | 0.07           |
| Fore udder length      | 15.1±3.6              | 13.9±3.3              | 13.7±2.6               | 14.1±3.1     | 0.23           |
| Rear udder length      | 13.2±0.4 <sup>a</sup> | 13.0±0.2 <sup>b</sup> | 13.0±0.2 <sup>b</sup>  | 13.1±0.3     | 0.020*         |
| Udder depth            | 19.2±5.6              | 17.4±5.0              | 18.8±5.1               | 18.4±4.8     | 0.3            |
| Central ligament       | 1.8±1.1               | 2.2±1.1               | 2.4±0.8                | 2.2±1.0      | 0.07           |
| Hoof height            | 2.6±1.2               | 2.8±1.1               | 2.6±1.1                | 2.7±1.1      | 0.8            |
| Rump angle             | 4.5±1.9               | 4.9±2.0               | 4.5±2.2                | 4.6±2.0      | 0.6            |
| Body condition         | 2.6±0.3               | 2.7±0.3               | 2.8±0.3                | 2.7±0.3      | 0.27           |
| <b>Lactation</b>       | <b>1st Lact</b>       | <b>2nd Lact</b>       | <b>≥ 3rd Lact</b>      | <b>Total</b> | <b>P-value</b> |
| N                      | 15                    | 50                    | 30                     | 95           |                |
| Height at cross (cm)   | 122.7±9.6             | 126.4±7.3             | 122.6±8.5              | 124.6±8.2    | 0.084          |
| Depth (cm)             | 72.9±8.2              | 68.6±6.0              | 71.7±8.7               | 70.3±7.5     | 0.06           |
| Hip width (cm)         | 42.9±4.4 <sup>b</sup> | 46.5±4.6 <sup>a</sup> | 45.4±3.8 <sup>a</sup>  | 45.6±4.4     | 0.022*         |
| Back length (cm)       | 91.2±12.9             | 87.6±9.5              | 90.4±12.2              | 89.1±11.0    | 0.397          |
| Rump length (cm)       | 43.8±3.2 <sup>b</sup> | 46.1±3.2 <sup>a</sup> | 45.0±2.8 <sup>ab</sup> | 45.4±3.2     | 0.034*         |
| Teats length (cm)      | 5.6±1.5               | 5.7±1.4               | 5.7±1.3                | 5.7±1.4      | 0.983          |
| Teats thickness (cm)   | 2.7±0.5               | 2.7±0.5               | 2.8±0.4                | 2.7±0.5      | 0.4            |
| Fore udder length (cm) | 13.4±3.2              | 14.5±3.4              | 13.8±2.4               | 14.1±3.1     | 0.428          |
| Rear udder length (cm) | 13.1±0.4              | 13.1±0.3              | 13.0±0.2               | 13.1±0.3     | 0.449          |
| Udder depth (cm)       | 19.1±4.5              | 18.7±5.2              | 17.6±4.0               | 18.4±4.8     | 0.517          |
| Central ligament (cm)  | 2.1±1.0               | 2.1±1.1               | 2.3±0.8                | 2.2±1.0      | 0.58           |
| Hoofs height (cm)      | 2.4±1.2               | 2.7±1.0               | 2.8±1.3                | 2.7±1.1      | 0.677          |
| Body condition         | 2.7±0.2               | 2.7±0.3               | 2.8±0.3                | 2.7±0.3      | 0.204          |

<sup>1</sup>Duncan's multiple comparisons with an alpha level of 0.05 in SPSS v. 15. \* Significant (p < 0.05).
